# Supplementary material
Source: PubMed Central journal article supplement (PMC1182461)
Supplement: pnas_0504952102_1.pdf [file pnas_0504952102_1.pdf]

Table 2. Kinase Inhibitors tested

| Inhibitor                 | Primary Targets    | Status               |
|---------------------------|--------------------|----------------------|
| <b>ABL/KIT Inhibitors</b> |                    |                      |
| Imatinib                  | ABL, KIT, PDGFR    | FDA approved         |
| VX-680                    | Aurora             | Phase I              |
| MLN-518                   | FLT3, KIT          | Phase I              |
| BMS-354825                | ABL, SRC           | Phase II             |
| SU-11248                  | FLT3, KIT          | Phase III            |
| BIRB-796                  | p38                | Phase III (discont.) |
| PD-180970                 | ABL, KIT           | Research compound    |
| <b>EGFR Inhibitors</b>    |                    |                      |
| Gefitinib                 | EGFR               | FDA approved         |
| Erlotinib                 | EGFR               | FDA approved         |
| EKB-569                   | EGFR, ERBB2        | Phase II             |
| CI-1033                   | EGFR subfamily     | Phase II             |
| ZD-6474                   | VEGFR2, EGFR       | Phase II             |
| PKI-166                   | EGFR               | Phase II (discont.)  |
| GW-572016                 | EGFR, ERBB2, ERBB4 | Phase III            |
| CL-387785                 | EGFR               | Research compound    |
| SU-11464                  | EGFR               | Research compound    |

FDA, Food and Drug Administration
