# Supplementary material
Source: PubMed Central journal article supplement (PMC1182461)
Supplement: pnas_0504952102_3.pdf [file pnas_0504952102_3.pdf]

**Table 3. Results of cell-based assays for inhibition of KIT(V559D) and KIT(V559D/T670I) autophosphorylation**

|                   | <b>KIT(V559D)</b>           | <b>KIT(V559D/T670I)</b>     |
|-------------------|-----------------------------|-----------------------------|
|                   | <b>IC<sub>50</sub> (nM)</b> | <b>IC<sub>50</sub> (nM)</b> |
| <b>Imatinib</b>   | <b>90</b>                   | <b>&gt; 10000</b>           |
| <b>PD-180970</b>  | <b>90</b>                   | <b>&gt; 10000</b>           |
| <b>MLN-518</b>    | <b>400</b>                  | <b>&gt; 10000</b>           |
| <b>BMS-354825</b> | <b>8</b>                    | <b>&gt; 10000</b>           |
| <b>SU-11248</b>   | <b>100</b>                  | <b>70</b>                   |

Each value is the average of at least two independent measurements.
