# Supplementary material
Source: PubMed Central journal article supplement (PMC1182461)
Supplement: pnas_0504952102_4.pdf [file pnas_0504952102_4.pdf]

Table 4. Primary screen for growth inhibition of EGFR(L858R/T790M)-containing cell line H1975

|                                      | Inhibition of H1975 cell proliferation at 2 micromolar compound (percent) |
|--------------------------------------|---------------------------------------------------------------------------|
| 1-Azakenpaullone (Calbiochem)        | 31                                                                        |
| BAY-37-9751                          | < 25                                                                      |
| BMS-354825                           | 69                                                                        |
| BMS-387032                           | 63                                                                        |
| BPIQ-1(Calbiochem)*                  | < 25                                                                      |
| CI-1033                              | 85                                                                        |
| CL-387785 (Calbiochem)               | 86                                                                        |
| EGFR/ERBB2 Inhibitor (Calbiochem)*   | < 25                                                                      |
| EKB-569                              | 87                                                                        |
| Erlotinib                            | 32                                                                        |
| Gefitinib                            | 46                                                                        |
| GSK3B Inhibitor VIII (Calbiochem)*   | 27                                                                        |
| H-89 (Calbiochem)                    | < 25                                                                      |
| IKK-2 Inhibitor IV (Calbiochem)*     | 35                                                                        |
| IKK-2 Inhibitor V (Calbiochem)*      | 76                                                                        |
| Imatinib                             | < 25                                                                      |
| JAK Inhibitor I (Calbiochem)*        | < 25                                                                      |
| Lapatinib (GW-572016)                | not in initial screen; see Table 5 for IC <sub>50</sub>                   |
| LY-294002 (Calbiochem)               | < 25                                                                      |
| MLN-518                              | 28                                                                        |
| PD-153035 (Calbiochem)               | 49                                                                        |
| PD-173955                            | 52                                                                        |
| PD-180970                            | 55                                                                        |
| PD-98059 (Calbiochem)                | < 25                                                                      |
| PKI-166                              | not in initial screen; see Table 5 for IC <sub>50</sub>                   |
| PP1 (Calbiochem)                     | 60                                                                        |
| Purvalanol B                         | < 25                                                                      |
| Quercetin dihydrate (Calbiochem)     | 27                                                                        |
| Raf Kinase Inhibitor I (Calbiochem)* | < 25                                                                      |
| RWJ-67657                            | < 25                                                                      |
| SB-202190 (Calbiochem)               | < 25                                                                      |
| SB-216763 (Biomol)                   | 37                                                                        |
| SB-415286 (Biomol)                   | < 25                                                                      |
| SP600125 (Calbiochem)                | < 25                                                                      |
| SU-11248                             | < 25                                                                      |
| SU-11464                             | not in initial screen; see Table 5 for IC <sub>50</sub>                   |
| SU-5416                              | < 25                                                                      |
| SU-5614                              | < 25                                                                      |
| SU-6668                              | < 25                                                                      |
| SYK Inhibitor (Calbiochem)*          | < 25                                                                      |
| TGFBR1 Inhibitor (Calbiochem)*       | < 25                                                                      |
| TRKA Inhibitor (Calbiochem)*         | < 25                                                                      |
| Vatalanib                            | < 25                                                                      |
| VX-680                               | 34                                                                        |
| VX-745                               | < 25                                                                      |
| ZD-6474                              | 56                                                                        |
| ZM-336372                            | < 25                                                                      |

Each compound was tested in duplicate at a final concentration of 2 micromolar.

Compounds were either purchased from the indicated vendor, or custom synthesized.

\* Names as listed in Calbiochem catalog.
