# Supplementary material
Source: PubMed Central journal article supplement (PMC1182461)
Supplement: pnas_0504952102_6.pdf [file pnas_0504952102_6.pdf]

Table 5. The effect of known EGFR inhibitors on growth of the EGFR(L858R/T790M)-containing cell line H1975

| Compound              | IC <sub>50</sub> * (nanomolar) |
|-----------------------|--------------------------------|
| Gefitinib (Iressa)    | 7000                           |
| Erlotinib (Tarceva)   | 10000                          |
| Lapatinib (GW-572016) | 4000                           |
| EKB-569               | 30                             |
| CI-1033               | 20                             |
| CL-387785             | 50                             |
| ZD-6474               | 2000                           |
| PKI-166               | 8000                           |
| SU-11464              | 500                            |

\* IC<sub>50</sub> for inhibition of proliferation of H1975 cells.

Each IC<sub>50</sub> was measured at least in duplicate, and average values are shown.
