# Supplementary material
Source: PubMed Central journal article supplement (PMC1182461)
Supplement: pnas_0504952102_7.pdf [file pnas_0504952102_7.pdf]

Table 6. Complete quantitative results of screening BMS-354825 and VX-680 against a large panel of kinases.

|                           | BMS-354825 | VX-680  |
|---------------------------|------------|---------|
| Kinase                    | Kd (nM)    | Kd (nM) |
| AAK1                      | No hit     | 200     |
| ABL1                      | 0.5        | 20      |
| ABL2                      | 0.2        | 2       |
| ACK1                      | 6          | No hit  |
| ACVR2                     | 200        | ND      |
| ACVR2B                    | 600        | ND      |
| ALK                       | No hit     | ND      |
| AMPK-alpha1               | No hit     | No hit  |
| AURKA                     | 2000       | 2       |
| AURKC                     | No hit     | 2       |
| AXL                       | ND         | 100     |
| BIKE                      | No hit     | 70      |
| BLK                       | 0.2        | ND      |
| BMX                       | 1          | No hit  |
| BRAF                      | 500        | ND      |
| BRAF(V600E)               | 600        | ND      |
| BTK                       | 1          | No hit  |
| CAMK1                     | No hit     | No hit  |
| CAMK1D                    | No hit     | 8000    |
| CAMK1G                    | No hit     | No hit  |
| CAMK2A                    | No hit     | No hit  |
| CAMK2B                    | No hit     | No hit  |
| CAMK2D                    | No hit     | No hit  |
| CAMK2G                    | No hit     | No hit  |
| CAMKK1                    | No hit     | No hit  |
| CAMKK2                    | No hit     | No hit  |
| CDK2                      | No hit     | No hit  |
| CDK5                      | No hit     | No hit  |
| CLK1                      | No hit     | No hit  |
| CLK2                      | No hit     | No hit  |
| CLK3                      | No hit     | No hit  |
| CLK4                      | No hit     | No hit  |
| CSK                       | 1          | No hit  |
| CSNK1A1L                  | No hit     | ND      |
| CSNK1D                    | No hit     | ND      |
| CSNK1E                    | 2000       | No hit  |
| CSNK1G1                   | No hit     | No hit  |
| CSNK1G2                   | No hit     | No hit  |
| CSNK2A1                   | No hit     | 300     |
| CSNK2A2                   | No hit     | ND      |
| DAPK2                     | No hit     | No hit  |
| DAPK3                     | No hit     | No hit  |
| DMPK                      | 1000       | ND      |
| EGFR                      | 100        | No hit  |
| EGFR(E746-A750del)        | 100        | ND      |
| EGFR(G719C)               | 200        | ND      |
| EGFR(G719S)               | 80         | ND      |
| EGFR(L747-E749del, A750P) | 100        | ND      |
| EGFR(L747-S752del, P753S) | 300        | No hit  |
| EGFR(L747-T751del,Sins)   | 200        | ND      |
| EGFR(L858R)               | 100        | No hit  |
| EGFR(L861Q)               | 100        | ND      |
| EGFR(S752-I759del)        | 300        | ND      |
| EPHA2                     | 0.8        | No hit  |
| EPHA3                     | 0.09       | No hit  |
| EPHA4                     | 1          | No hit  |
| EPHA5                     | 0.2        | No hit  |
| EPHA6                     | 2000       | No hit  |
| EPHA7                     | No hit     | No hit  |
| EPHA8                     | 0.2        | 200     |
| EPHB1                     | 0.4        | 200     |
| EPHB4                     | 0.3        | No hit  |
| ERBB2                     | 1000       | ND      |
| ERBB4                     | 60         | No hit  |
| ERK2                      | No hit     | ND      |
| FER                       | No hit     | No hit  |
| FES                       | No hit     | ND      |

|                    | BMS-354825 | VX-680  |
|--------------------|------------|---------|
| Kinase             | Kd (nM)    | Kd (nM) |
| FGFR1              | 4000       | 600     |
| FGFR2              | 1000       | 700     |
| FGFR3              | 4000       | No hit  |
| FGR                | 0.5        | No hit  |
| FLT1               | ND         | 80      |
| FLT3               | 5000       | 4       |
| FLT4               | No hit     | No hit  |
| FRK                | 0.3        | No hit  |
| FYN                | 0.7        | No hit  |
| GAK                | 3          | 3000    |
| HCK                | 0.3        | No hit  |
| IGF1R              | No hit     | ND      |
| INSR               | No hit     | 700     |
| ITK                | No hit     | ND      |
| JAK1(Kin.Dom.1)    | No hit     | No hit  |
| JAK2(Kin.Dom.2)    | 1000       | 100     |
| JNK1               | No hit     | No hit  |
| JNK2               | No hit     | No hit  |
| JNK3               | No hit     | No hit  |
| KIT                | 0.6        | 200     |
| LCK                | 0.2        | 60      |
| LIMK1              | 600        | No hit  |
| LTK                | No hit     | ND      |
| LYN                | 0.6        | No hit  |
| MAP3K4             | 300        | No hit  |
| MAP3K5             | No hit     | No hit  |
| MAP4K1             | 1000       | ND      |
| MAP4K5             | 50         | 70      |
| MARK2              | No hit     | No hit  |
| MERTK              | No hit     | ND      |
| MKMK2              | No hit     | No hit  |
| MYLK2              | 4000       | 40      |
| NEK2               | 7000       | No hit  |
| NEK6               | No hit     | No hit  |
| NEK9               | No hit     | No hit  |
| NLK                | 300        | ND      |
| p38-alpha          | 30         | No hit  |
| p38-beta           | 400        | No hit  |
| p38-gamma          | No hit     | No hit  |
| PAK1               | No hit     | No hit  |
| PAK3               | No hit     | No hit  |
| PAK4               | No hit     | No hit  |
| PAK6               | No hit     | No hit  |
| PAK7/PAK5          | No hit     | No hit  |
| PCTK1              | No hit     | 160     |
| PDGFRA             | 0.4        | 2000    |
| PDGFRB             | 0.6        | 300     |
| PDPK1              | No hit     | ND      |
| PHKG1              | No hit     | No hit  |
| PHKG2              | No hit     | No hit  |
| PIM1               | No hit     | No hit  |
| PIM2               | No hit     | No hit  |
| PKAC-alpha         | No hit     | No hit  |
| PKMYT1             | 100        | No hit  |
| PLK4               | No hit     | 8       |
| PTK2               | No hit     | No hit  |
| PTK2B              | No hit     | ND      |
| PTK6               | 8          | No hit  |
| QIK                | 6          | ND      |
| RAF1               | 600        | ND      |
| RET                | 200        | 8       |
| RIPK2              | 30         | No hit  |
| ROS1               | No hit     | ND      |
| RPS6KA2(Kin.Dom.1) | No hit     | No hit  |
| RPS6KA3(Kin.Dom.1) | No hit     | No hit  |
| RPS6KA4(Kin.Dom.1) | No hit     | ND      |
| RPS6KA5(Kin.Dom.1) | No hit     | No hit  |
| SLK                | 700        | 100     |
| SRC                | 0.2        | 200     |

|             | BMS-354825 | VX-680  |
|-------------|------------|---------|
| Kinase      | Kd (nM)    | Kd (nM) |
| SRPK1       | No hit     | ND      |
| STK10       | 1000       | 100     |
| STK11       | No hit     | 80      |
| STK16       | No hit     | 400     |
| STK17A      | No hit     | No hit  |
| STK17B      | No hit     | No hit  |
| STK3        | No hit     | 600     |
| STK33       | No hit     | ND      |
| STK36       | 200        | No hit  |
| STK38L      | No hit     | No hit  |
| STK4        | 4000       | 200     |
| SYK         | 3000       | No hit  |
| TESK1       | 30         | ND      |
| TIE2        | No hit     | 600     |
| TNIK        | 2000       | No hit  |
| TNK1        | No hit     | ND      |
| TNNI3K      | 10         | ND      |
| TRKA        | No hit     | 20      |
| TTK         | No hit     | No hit  |
| TXK         | 2          | ND      |
| ULK3(mouse) | No hit     | No hit  |
| VEGFR2      | 3000       | No hit  |
| YANK2       | No hit     | ND      |
| YES         | 0.3        | 500     |

'ND' indicates kinase/compound combinations not tested.

'No hit' indicates no evidence of binding in a primary screen at a compound concentration of 10 micromolar
