# Supplementary material
Source: PubMed Central journal article supplement (PMC1182461)

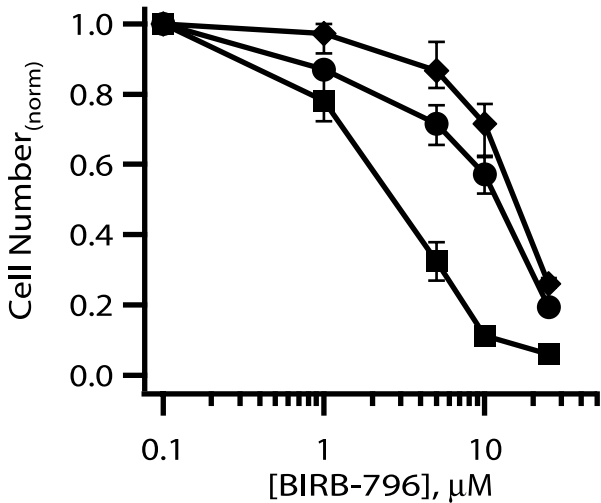

Supplement: pnas_0504952102_2.pdf [file pnas_0504952102_2.pdf]

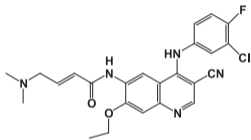

EKB-569

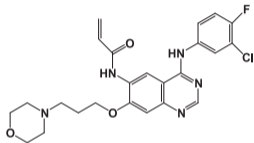

CI-1033

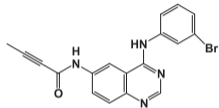

CL-387785

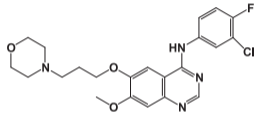

Gefitinib

Supplement: pnas_0504952102_5.pdf [file pnas_0504952102_5.pdf]
